# Supplementary material for: Cumulated advantages of enzymatic and carbene chemistry for the non-organometallic synthesis of (co)polyesters
Source: Royal Society of Chemistry journal article supplement (doi:10.1039/b819624a), 2009-01-01
Supplement: b819624a.pdf [file b819624a.pdf]

## Cumulated advantages of enzymatic and carbene chemistry for the non-organometallic synthesis of (co)polyester

Yan Xiao, Olivier Coulembier, Andreas Heise\*, and Philippe Dubois\*

### Experimental procedures

**Chemicals.**  $\epsilon$ -Caprolactone (CL) was purchased from Aldrich, distilled over  $\text{CaH}_2$  and stored over molecular sieves. Novozyme 435 (**E**) was obtained from Novozymes A/S, Denmark. L-Lactide (LA) was obtained from Purac, recrystallized from toluene three times prior to use and stored in a glovebox. Benzyl alcohol and toluene were distilled over  $\text{CaH}_2$ . Carbon disulfide (Acros) was dried on molecular sieves (4Å) for 12 hours. The carbene catalyst 1,3,4-Triphenyl-4,5-dihydro-1*H*-1,2,4-triazol-5-ylidene (*Wanzlick*-type carbene) was obtained from its commercially available methoxy-precursor following a procedure of Enders.<sup>1</sup> Thermolysis of its methanol adduct (Acros) under vacuum at 90 °C for 12 hours yielded the carbene catalyst by  $\alpha$ -elimination of methanol.

**Characterization.** Gel permeation chromatography was performed in tetrahydrofuran on a Waters chromatograph equipped with four 5  $\mu\text{m}$  Waters columns (300 mm  $\times$  7.7 mm) connected in series with increasing pore size (10, 100, 1000, 10<sup>5</sup>, 10<sup>6</sup> Å). Polystyrene samples of known molecular weight were used as calibration standards. A Waters 410 differential refractometer and 996 photodiode array detector were employed. THF was used as eluent with a flow rate of 1.0 ml/min. All samples were diluted to 1.0 mg/ml in THF and filtrated using 0.2  $\mu\text{m}$  syringe filters. <sup>1</sup>H- and <sup>13</sup>C-NMR spectroscopies were performed using a VARIAN 400 NMR at 20 °C. Samples were diluted in  $\text{CDCl}_3$  to 30-50 mg/ml. Data were processed using VNMR-software.

**General procedure for Novozym 435 polymerization of  $\epsilon$ -caprolactone.** Table 1, Entry 1-1. In a flame-dried and purged round bottom flask, a stock solution of benzyl alcohol (0.5 ml, 4.8 mmol) and toluene (25.5 ml) was prepared ( $[\text{I}]_0 = 0.18 \text{ M}$ ). In a second flamed-dried and purged flask, 0.02 g Novozym 435 (**E**) (10 wt.% with respect to monomer) was dried with a stirring bar under vacuum at 40 °C overnight. The reaction was started by adding 0.2 g  $\epsilon$ -caprolactone (1.8 mmol) and 0.19 ml stock solution ( $3.5 \times 10^{-5} \text{ mol}$ ) under nitrogen flow to the enzyme. The mixture was kept stirring at 90 °C for 6 hours, followed by the precipitation in cold methanol (yield: 70 %).

### General procedure for carbene polymerization of lactide

Table 1, Entry 4. In a glove-box, 0.2 g of L-lactide (1.4 mmol) was charged in a flame-dried and purged round bottom flask containing 9 mg of 5-methoxy-1,3,4-triphenyl-4,5-dihydro-1*H*-1,2,4-triazol-5-ylidene previously dried under vacuum for 12 hours at 90°C to generate the 1,3,4-triphenyl-4,5-dihydro-1*H*-1,2,4-triazol-5-ylidene active carbene (**C**). Outside of the glove-box, 0.15 ml of an initiator stock solution of benzyl alcohol (0.5 ml, 4.8 mmol) in toluene (25.5 ml) was added ( $2.79 \times 10^{-5} \text{ mol}$ ) under nitrogen by using a dried and purged syringe. After 6 hours at 90 °C, the polymerization was quenched by addition of dried  $\text{CS}_2$  (0.4 ml, 6.9 mmol) and the

medium was precipitated in excess of cold methanol (~20 ml). The recovered polymer was dried until constant weight and analyzed by SEC and NMR analysis.  
Yield = 82%

**General procedure for  $\epsilon$ -caprolactone/L-Lactide copolymerization.** Table 2, Entry 2-3. In a flame-dried and purged round bottom flask, a stock solution of benzyl alcohol (0.5 ml, 4.8 mmol) and toluene (25.5 ml) was prepared ( $[I]_0 = 0.18$  M). In a second flame-dried and purged round bottom flask, 0.18 g of Novozym 435 (10 wt % of monomers) was dried under vacuum for 12 hours at 40 °C. At room temperature, 1 ml of  $\epsilon$ -caprolactone (7.0 mmol) and 1.5 ml of the initiator stock solution were added under nitrogen ( $2.79 \times 10^{-4}$  mol). The mixture was then kept stirring at 60 °C for 6 hours. Then, the mixture was added by a purged capillary to a mixture of 92 mg of 5-methoxy-1,3,4-triphenyl-4,5-dihydro-1*H*-1,2,4-triazol-5-ylidene and 1 g of L-lactide (6.9 mmol) in a previously purged and dried round bottom flask. The copolymerization was then initiated by increasing the temperature to 90 °C. After 6 hours, the solution was filtered and precipitated in excess of cold methanol. The recovered polymer was dried until constant weight and analyzed by SEC and NMR analysis (yield: 62 %).

**Table 1:** PCL-PLA block polymers with different compositions obtained in a one pot polymerization.

| Entry | DP <sub>CL</sub> |                   | DP <sub>LA</sub> |                   | Mn (g/mol) <sup>a</sup> |                    |
|-------|------------------|-------------------|------------------|-------------------|-------------------------|--------------------|
|       | Targeted         | Exp. <sup>b</sup> | Targeted         | Exp. <sup>b</sup> | PCL <sup>c</sup>        | PCL- <i>b</i> -PLA |
| 1     | 15               | 13                | 35               | 38                | 4,150                   | 9,020              |
| 2     | 25               | 26                | 25               | 25                | 7,070                   | 10,540             |
| 3     | 35               | 37                | 15               | 13                | 8,180                   | 9,870              |

<sup>a</sup> Determined by SEC in THF with polystyrene standards. <sup>b</sup> Determined by <sup>1</sup>H-NMR analysis : DP<sub>CL</sub> =  $[I_{4.1}/(I_{3.65}+2I_{4.35})]$ ; DP<sub>LA</sub> =  $[I_{5.1}/(I_{3.65}+2I_{4.35})]$ . <sup>c</sup> Samples taken out before LA polymerization.

(1) D. Enders, K. Breuer, G. Raabe, J. Runnink, J. H. Teles, J.-P. Melder, K. Ebel, S. Brode, *Angew. Chem.* 1995, **107**, 1119.
